# Supplementary material for: Resource-Oriented Sanitation: On-Farm Septage Treatment and Nutrient Recycling for Sustainable Agriculture in the Philippines
Source: MDPI journal article supplement (doi:10.3390/su15139904), 2023-06-21

### Supplementary Information

Table S1. Material balance for raw materials and intermediate products for every 100 L of raw septage processed (1 batch process)

| Material Balance          | Raw Materials        |         |             |                                      |                    | Intermediate Product |             |                    |
|---------------------------|----------------------|---------|-------------|--------------------------------------|--------------------|----------------------|-------------|--------------------|
|                           | Raw Septage          | 37% HCl | 8.35 M NaOH | MgCl <sub>2</sub> .6H <sub>2</sub> O | NH <sub>4</sub> Cl | Hydrolysed septage   | Supernatant | Supernatant Losses |
| Volume, L                 | 100.00               | 0.71    | 0.37        | -                                    | -                  | 100.71               | 63.23       | 20.00              |
| Mass, kg                  | 100.60               | 0.85    | 0.48        | 0.018                                | 0.009              | 101.45               | 63.23       | 20.00              |
| NPK                       |                      |         |             |                                      |                    |                      |             |                    |
| Total Nitrogen, g         | 101.72               | -       | -           | -                                    | 2.39               | 101.72               | 55.58       | 17.58              |
| Total Phosphorous, g      | 69.89                | -       | -           | -                                    | -                  | 69.89                | 45.79       | 14.48              |
| Potassium, g              | 49.31                | -       | -           | -                                    | -                  | 49.31                | 36.69       | 11.61              |
| Calcium, g                | 172.41               | -       | -           | -                                    | -                  | 172.41               | 122.12      | 38.63              |
| Magnesium, g              | 19.97                | -       | -           | 2.15                                 | -                  | 19.97                | 12.96       | 4.10               |
| Heavy Metals              |                      |         |             |                                      |                    |                      |             | 0.00               |
| Arsenic, g                | 0.03                 | -       | -           | -                                    | -                  | 0.03                 | 0.01        | 0.00               |
| Cadmium, g                | 0.04                 | -       | -           | -                                    | -                  | 0.04                 | 0.03        | 0.01               |
| Iron, g                   | 135.71               | -       | -           | -                                    | -                  | 135.71               | 85.23       | 26.96              |
| Mercury, g                | <0.0002              | -       | -           | -                                    | -                  | <0.0002              | <0.0002     | <0.0002            |
| Lead, g                   | 0.63                 | -       | -           | -                                    | -                  | 0.63                 | 0.33        | 0.11               |
| Zinc, g                   | 16.27                | -       | -           | -                                    | -                  | 16.27                | 9.09        | 2.87               |
| Microbiological           |                      |         |             |                                      |                    |                      |             |                    |
| Fecal Coliform, MPN/100mL | 9.20x10 <sup>5</sup> | -       | -           | -                                    | -                  | N/A                  | N/A         | N/A                |
| <i>E.coli</i> , MPN/100mL | 9.20x10 <sup>5</sup> | -       | -           | -                                    | -                  | N/A                  | N/A         | N/A                |

Table S2. Material balance for recovered phosphorous fertiliser and by-products for every 100 L of raw septage processed (1 batch process)

| Material Balance          | Product                          | By-product   |          |                 |
|---------------------------|----------------------------------|--------------|----------|-----------------|
|                           | Recovered phosphorous fertiliser | Waste sludge | Effluent | Effluent Losses |
| Volume, L                 | -                                | -            | 38.37    | 20.00           |
| Mass, kg                  | 0.29                             | 1.87         | 38.37    | 20.00           |
| NPK                       |                                  |              |          |                 |
| Total Nitrogen, g         | 0.59                             | 28.56        | 4.76     | 2.48            |
| Total Phosphorous, g      | 9.61                             | 9.61         | 0.00     | 0.00            |
| Potassium, g              | 0.71                             | 1.01         | 1.15     | 0.60            |
| Calcium, g                | 22.03                            | 11.67        | 60.24    | 31.40           |
| Magnesium, g              | 4.53                             | 2.91         | 2.95     | 1.54            |
| Heavy Metals              |                                  |              |          |                 |
| Arsenic, g                | ND                               | 0.01         | 0.00     | 0.00            |
| Cadmium, g                | 0.00                             | 0.01         | <0.001   | 0.00            |
| Iron, g                   | 12.80                            | 23.52        | 0.00     | 0.00            |
| Mercury, g                | <0.0002                          | <0.0002      | <0.0002  | <0.0002         |
| Lead, g                   | 0.01                             | 0.19         | <0.005   | 0.00            |
| Zinc, g                   | 0.15                             | 4.31         | 0.00     | 0.00            |
| Microbiological           |                                  |              |          |                 |
| Fecal Coliform, MPN/100mL | 0.25                             | 0.21         | 2.00     | N/A             |
| <i>E.coli</i> , MPN/100mL | 0.25                             | 0.21         | 2.00     | N/A             |

Table S3. Ratio of raw materials, by-products, and recovered phosphorous fertiliser per L of septage

| Materials                                         | Ratio of Materials per L septage |       |                  |
|---------------------------------------------------|----------------------------------|-------|------------------|
|                                                   | Salikneta                        | SpTP  | Salikneta + SpTP |
| <b>Raw Materials</b>                              |                                  |       |                  |
| 37% HCl, mL/L septage                             | 5.75                             | 7.24  | 7.15             |
| 8.35 M NaOH, mL/L septage                         | 1.98                             | 3.82  | 3.71             |
| 98% NaOH, g/L septage                             | 0.67                             | 1.30  | 1.26             |
| MgCl <sub>2</sub> .6H <sub>2</sub> O, g/L septage | 0.19                             | 0.22  | 0.22             |
| NH <sub>4</sub> Cl, g/L septage                   | 0.10                             | 0.11  | 0.11             |
| <b>By-products</b>                                |                                  |       |                  |
| Waste Sludge, kg/L septage                        | 18.00                            | 18.71 | 18.67            |
| Effluent, L/L septage                             | 0.34                             | 0.39  | 0.38             |
| <b>Product</b>                                    |                                  |       |                  |
| Recovered phosphorous fertiliser, g/L septage     | 1.97                             | 2.99  | 2.92             |

Figure S1. Fabricated nutrient recovery batch reactor installed at Salikneta Farm

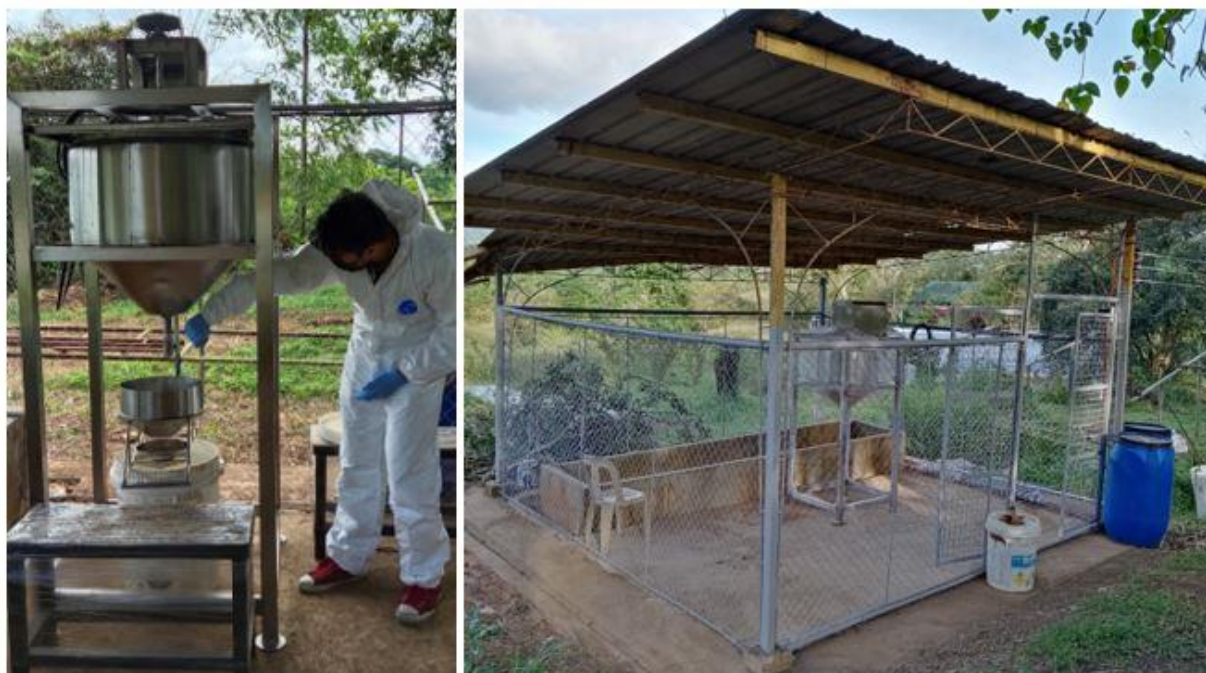

Figure S2. Tomato and eggplant cultivated using the recovered phosphorous fertiliser from septage

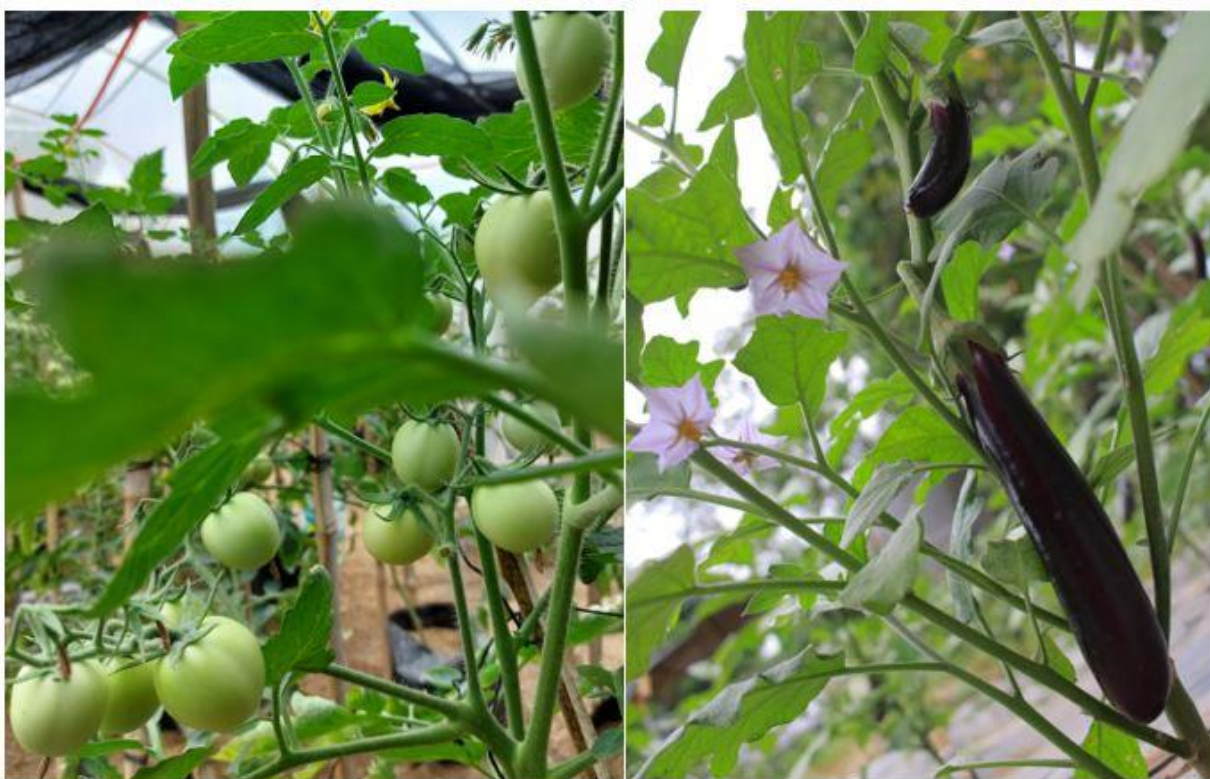

Supplement: s1 [file s1]
